# Supplementary material for: Deep learning applications in coronary anatomy imaging: a systematic review and meta-analysis
Source: PubMed Central journal article supplement — J Med Artif Intell. Author manuscript; Available in PMC 2023 Feb 28. (PMC7614252; doi:10.21037/jmai-22-36), 2022-12
Supplement: EMS163415-supplement-supplementary_Material.pdf [file EMS163415-supplement-supplementary_Material.pdf]

**Table S1** List of all studies with their corresponding risk of bias assessments

| Study, year         | Patient selection | Index test | Reference test | Index test results blinded | Reference test results blinded |
|---------------------|-------------------|------------|----------------|----------------------------|--------------------------------|
| Carson, 2020        | ?                 | -          | +              | -                          | ?                              |
| Hoshino, 2020       | +                 | +          | +              | ?                          | ?                              |
| Son, 2020           | +                 | -          | +              | -                          | +                              |
| Eberhard, 2020      | +                 | +          | +              | ?                          | ?                              |
| Wang, 2020          | ?                 | +          | +              | ?                          | ?                              |
| Hong, 2019          | +                 | -          | +              | -                          | ?                              |
| Podgorsak, 2020     | +                 | +          | +              | ?                          | ?                              |
| Min, 2020           | ?                 | -          | +              | -                          | ?                              |
| Wang, 2019          | +                 | +          | +              | ?                          | +                              |
| Lee, 2019           | +                 | +          | +              | ?                          | +                              |
| Hamaya, 2020        | +                 | +          | +              | ?                          | ?                              |
| Yabushita, 2021     | +                 | -          | +              | -                          | +                              |
| Hong, 2020          | +                 | -          | +              | -                          | +                              |
| He, 2020            | +                 | -          | +              | -                          | ?                              |
| Gessert, 2019       | +                 | -          | +              | -                          | ?                              |
| Kang, 2015          | +                 | +          | +              | -                          | +                              |
| Rodrigues, 2016     | +                 | +          | +              | -                          | ?                              |
| Wolterink, 2016     | +                 | -          | +              | -                          | ?                              |
| Al'Aref, 2020       | +                 | +          | +              | +                          | +                              |
| Araki, 2016         | +                 | -          | +              | -                          | ?                              |
| Tesche, 2021        | +                 | +          | +              | -                          | ?                              |
| Chen, 2020          | +                 | +          | +              | +                          | +                              |
| Du, 2021            | +                 | -          | +              | -                          | ?                              |
| Zhang, 2020         | +                 | -          | +              | -                          | ?                              |
| Lin, 2020           | +                 | +          | +              | -                          | ?                              |
| Xu, 2017            | +                 | -          | +              | -                          | ?                              |
| Yong, 2017          | +                 | -          | +              | -                          | ?                              |
| Kolluru, 2018       | +                 | -          | +              | -                          | ?                              |
| Huo, 2019           | +                 | -          | +              | -                          | ?                              |
| Han, 2020           | +                 | +          | +              | ?                          | ?                              |
| Kawaguchi, 2018     | +                 | -          | +              | -                          | ?                              |
| Han, 2020           | +                 | +          | +              | +                          | +                              |
| van den Oever, 2020 | +                 | -          | +              | -                          | +                              |
| Shu, 2022           | +                 | -          | +              | -                          | +                              |
| Candemir, 2020      | +                 | -          | +              | -                          | ?                              |
| Zhang, 2018         | +                 | -          | +              | -                          | ?                              |
| Miyoshi, 2020       | +                 | +          | +              | ?                          | +                              |
| Kumamaru, 2020      | +                 | +          | +              | ?                          | ?                              |
| Zreik, 2020         | +                 | -          | +              | -                          | ?                              |
| Dey, 2018           | +                 | +          | +              | +                          | +                              |

Table S1 (continued)

**Table S1** (continued)

| Study, year          | Patient selection | Index test | Reference test | Index test results blinded | Reference test results blinded |
|----------------------|-------------------|------------|----------------|----------------------------|--------------------------------|
| Sampedro-Gómez, 2020 | +                 | +          | +              | +                          | +                              |
| Šprem, 2018          | +                 | -          | +              | -                          | ?                              |
| van Velzen, 2020     | +                 | -          | +              | -                          | ?                              |
| Fischer, 2020        | +                 | -          | +              | -                          | ?                              |
| Zreik, 2019          | +                 | -          | +              | -                          | ?                              |
| Wu, 2020             | +                 | -          | +              | -                          | ?                              |
| Hae, 2018            | +                 | -          | +              | -                          | ?                              |
| Lessmann, 2018       | +                 | -          | +              | -                          | ?                              |
| Stuckey, 2018        | +                 | -          | +              | -                          | +                              |
| Lee JG, 2020         | +                 | -          | +              | -                          | ?                              |
| van Rosendael, 2018  | +                 | +          | +              | -                          | ?                              |
| Commandeur, 2019     | +                 | -          | +              | -                          | +                              |
| Kawasaki, 2020       | +                 | -          | +              | -                          | +                              |
| Yang, 2019           | +                 | -          | +              | -                          | ?                              |
| Lee PC, 2019         | +                 | -          | +              | -                          | ?                              |
| Zhang, 2019          | +                 | +          | +              | ?                          | ?                              |
| Al'Aref, 2020        | +                 | -          | +              | -                          | ?                              |
| Wang, 2020           | +                 | -          | +              | -                          | ?                              |
| Benz, 2020           | +                 | +          | +              | +                          | +                              |
| Muscogiuri, 2020     | +                 | -          | +              | -                          | ?                              |
| Kigka, 2019          | +                 | -          | +              | -                          | ?                              |
| Jun, 2019            | +                 | -          | +              | -                          | ?                              |
| Gharaibeh, 2019      | +                 | -          | +              | -                          | ?                              |
| Głowacki, 2020       | +                 | -          | +              | -                          | ?                              |
| Su, 2017             | +                 | -          | +              | -                          | ?                              |
| Oh, 2018             | +                 | -          | ?              | -                          | -                              |
| Liu, 2019            | +                 | -          | +              | -                          | ?                              |
| Zreik, 2018          | +                 | -          | +              | -                          | +                              |
| Abdolmanafi, 2019    | +                 | -          | +              | -                          | ?                              |
| Commandeur, 2020     | +                 | +          | +              | +                          | +                              |
| Masuda, 2019         | +                 | +          | +              | ?                          | ?                              |
| Gangl, 2019          | +                 | -          | +              | -                          | ?                              |
| Itu, 2016            | +                 | +          | +              | ?                          | ?                              |
| Oikonomou, 2019      | +                 | +          | +              | ?                          | ?                              |
| Datong, 2019         | +                 | -          | +              | -                          | ?                              |
| Liu, 2019            | +                 | -          | +              | -                          | ?                              |
| Wang, 2019           | +                 | +          | +              | +                          | +                              |
| Kolossváry, 2019     | +                 | +          | +              | +                          | +                              |
| Johnson, 2019        | +                 | +          | +              | ?                          | ?                              |
| van Hamersvelt, 2019 | +                 | +          | +              | ?                          | ?                              |
| Cho, 2019            | +                 | -          | +              | -                          | ?                              |

+, no risk of bias; -, equivocal risk; ?, high risk of bias.
